# Supplementary material for: Polygenic Type 2 Diabetes Prediction at the Limit of Common Variant Detection
Source: PubMed Central journal article supplement — Diabetes. 2014 May 15;63(6):2172–82. doi: 10.2337/db13-1663 (PMC4030114; doi:10.2337/db13-1663), 2014-05-15
Supplement: Supplementary_Data.pdf [file Supplementary_Data.pdf]

SUPPLEMENTARY DATA

**Supplementary Table 1:** Rationale for categorizing 30 T2D-associated single-nucleotide polymorphisms (SNP) as affecting  $\beta$ -cell function or insulin resistance, based on known gene function or specific metabolic phenotypes in the Meta-Analysis of Glucose and Insulin-related traits Consortium (MAGIC).

|                                         |               |                 |             |            |               | <b>Physiology based on MAGIC analyses</b> |                      |                        |                               |                                    |                       |                       |
|-----------------------------------------|---------------|-----------------|-------------|------------|---------------|-------------------------------------------|----------------------|------------------------|-------------------------------|------------------------------------|-----------------------|-----------------------|
| SNP                                     | Locus         | Chr             | Risk allele | T2D effect | HOMA- $\beta$ |                                           | HOMA- $\beta$ effect |                        | AIR                           | Proinsulin                         | Physiology clustering |                       |
|                                         |               |                 |             |            | effect        | <i>p</i>                                  | <-0.008              | <i>p</i> <0.05         |                               |                                    |                       | <i>p</i> <0.05        |
| <b><math>\beta</math>-cell function</b> | rs10830963    | <i>MTNR1B</i>   | 11          | G          | 0.0414        | -0.0394                                   | 8.6E-23              | xx                     | xx                            |                                    |                       |                       |
|                                         | rs10203174    | <i>THADA</i>    | 2           | C          | 0.0569        | -0.0262                                   | 9.8E-06              | x                      |                               |                                    | x                     |                       |
|                                         | rs6819243     | <i>MAEA</i>     | 4           | T          | 0.0294        | -0.0249                                   | 9.5E-03              | x                      |                               |                                    |                       |                       |
|                                         | rs7903146     | <i>TCF7L2</i>   | 10          | T          | 0.1399        | -0.0200                                   | 1.4E-07              | x                      | x                             |                                    | x                     |                       |
|                                         | rs11717195    | <i>ADCY5</i>    | 3           | T          | 0.0492        | -0.0181                                   | 2.7E-05              | x                      |                               |                                    | x                     |                       |
|                                         | rs1552224     | <i>ARAP1</i>    | 11          | A          | 0.0374        | -0.0166                                   | 9.4E-05              | x                      | x                             |                                    | x                     |                       |
|                                         | rs3802177     | <i>SLC30A8</i>  | 8           | G          | 0.0531        | -0.0160                                   | 2.0E-05              | x                      | x                             | x                                  | x                     |                       |
|                                         | rs10758593    | <i>GLIS3</i>    | 9           | A          | 0.0253        | -0.0145                                   | 1.3E-05              | x                      |                               |                                    |                       |                       |
|                                         | rs10278336    | <i>GCK</i>      | 7           | A          | 0.0374        | -0.0128                                   | 2.1E-04              | x                      | x                             |                                    |                       |                       |
|                                         | rs17168486    | <i>DGKB</i>     | 7           | T          | 0.0374        | -0.0126                                   | 3.0E-03              | x                      | x                             |                                    | x                     |                       |
|                                         | rs2075423     | <i>PROX1</i>    | 1           | G          | 0.0294        | -0.0125                                   | 3.9E-04              | x                      | x                             |                                    | x                     |                       |
|                                         | rs4402960     | <i>IGF2BP2</i>  | 3           | T          | 0.0531        | -0.0115                                   | 1.2E-03              | x                      | x                             | x                                  |                       |                       |
|                                         | rs4502156     | <i>VPS13C</i>   | 15          | T          | 0.0212        | -0.0099                                   | 3.6E-03              | x                      |                               |                                    |                       |                       |
|                                         | rs7756992     | <i>CDKAL1</i>   | 6           | G          | 0.0607        | -0.0095                                   | 7.5E-03              | x                      | xx                            | x                                  | x                     |                       |
|                                         | rs11257655    | <i>CDC123</i>   | 10          | T          | 0.0334        | -0.0091                                   | 2.5E-02              | x                      | x                             |                                    |                       |                       |
|                                         | rs1496653     | <i>UBE2E2</i>   | 3           | A          | 0.0374        | -0.0088                                   | 1.9E-02              | x                      |                               |                                    |                       |                       |
|                                         | rs163184      | <i>KCNQ1</i>    | 11          | G          | 0.0374        | -0.0086                                   | 1.6E-02              | x                      |                               | x                                  |                       |                       |
|                                         | rs10811661    | <i>CDKN2A/B</i> | 9           | T          | 0.0755        | -0.0085                                   | 5.1E-02              | x                      | x                             | x                                  | x                     |                       |
|                                         | rs1111875     | <i>HHEX/IDE</i> | 10          | C          | 0.0374        | -0.0042                                   | 2.0E-01              |                        | xx                            | x                                  | x                     |                       |
| rs5215                                  | <i>KCNJ11</i> | 11              | C           | 0.0294     | 0.0009        | 7.8E-01                                   |                      |                        | x                             |                                    |                       |                       |
|                                         |               |                 |             |            |               | HOMA-IR effect                            | <i>p</i>             | HOMA-IR <i>p</i> <0.05 | FI <i>p</i> <10 <sup>-8</sup> | Obesity <i>p</i> <10 <sup>-8</sup> | IR lipid profile      | Physiology clustering |
| <b>Insulin resistance</b>               | rs12970134    | <i>MC4R</i>     | 18          | A          | 0.0334        | 0.0084                                    | 7.6E-02              |                        |                               | x                                  |                       | x                     |
|                                         | rs13233731    | <i>KLF14</i>    | 7           | G          | 0.0043        | 0.0077                                    | 5.1E-02              | x                      |                               |                                    | x                     |                       |
|                                         | rs13389219    | <i>GRB14</i>    | 2           | C          | 0.0374        | 0.0124                                    | 2.2E-03              | x                      | x                             |                                    |                       |                       |
|                                         | rs1801282     | <i>PPARG</i>    | 3           | C          | 0.0453        | 0.0161                                    | 5.6E-03              | x                      | x                             |                                    | x                     |                       |
|                                         | rs2261181     | <i>HMG A2</i>   | 12          | T          | 0.0414        | 0.0135                                    | 4.9E-02              | x                      |                               |                                    |                       |                       |
|                                         | rs2943640     | <i>IRS1</i>     | 2           | C          | 0.0414        | 0.0086                                    | 3.6E-02              | x                      | x                             |                                    | x                     |                       |
|                                         | rs459193      | <i>ANKRD55</i>  | 5           | G          | 0.0414        | 0.0115                                    | 1.1E-02              | x                      |                               |                                    |                       |                       |
|                                         | rs780094      | <i>GCKR</i>     | 2           | C          | 0.0334        | 0.0201                                    | 7.6E-07              | x                      | x                             |                                    | x                     |                       |
|                                         | rs8182584     | <i>PEPD</i>     | 19          | T          | 0.0212        | 0.0122                                    | 3.9E-03              | x                      | x                             |                                    |                       |                       |
| rs9936385                               | <i>FTO</i>    | 16              | C           | 0.0531     | 0.0148        | 3.3E-04                                   | x                    |                        | x                             |                                    | x                     |                       |

Physiology clustering as  $\beta$ -cell function or insulin resistance based on MAGIC analyses(1). Fasting insulin (FI) *p*-values based on body-mass index\*gene analyses in (2). Obesity defined as association with risk of increased body-mass index in Genetic Investigation of ANthropometric Traits (GIANT) data(3). Insulin resistance (IR) lipid profile defined as

## SUPPLEMENTARY DATA

high triglyceride and low HDL levels as reported in (2). AIR—acute insulin response; Chr—chromosome; FI: fasting insulin; HOMA—homeostasis model of assessment; IGI—insulinogenic index; MAGIC—Meta-Analysis of Glucose and Insulin-related traits Consortium; SNP—single-nucleotide polymorphism; T2D—type 2 diabetes.

SUPPLEMENTARY DATA

**Supplementary Table 2: Mean  $\beta$ -cell ( $GRS_{\beta}$ ) and insulin resistance ( $GRS_{IR}$ ) genotype risk scores in the Framingham Offspring and CARDIA Studies**

|                                 | Total      | BMI<30 kg/m <sup>2</sup> | BMI≥30 kg/m <sup>2</sup> |
|---------------------------------|------------|--------------------------|--------------------------|
| <b><math>GRS_{\beta}</math></b> |            |                          |                          |
| <b>FOS</b>                      | 21.6 (3.0) | 21.6 (3.0)               | 21.6 (2.9)               |
| T2D                             | 22.6 (3.0) | 23.2 (3.1)               | 22.4 (2.6)               |
| No T2D                          | 21.6 (3.0) | 21.6 (3.0)               | 21.6 (2.9)               |
| <b>CARDIA Whites</b>            | 21.2 (3.1) | 21.2 (3.1)               | 21.0 (3.2)               |
| T2D                             | 22.1 (3.3) | 22.3 (3.4)               | 21.6 (2.9)               |
| No T2D                          | 21.2 (3.1) | 21.2 (3.1)               | 20.7 (3.3)               |
| <b>CARDIA Blacks</b>            | 21.3 (2.4) | 21.4 (2.4)               | 21.1 (2.4)               |
| T2D                             | 21.6 (2.5) | 21.6 (2.5)               | 21.7 (2.5)               |
| No T2D                          | 21.3 (2.4) | 21.3 (2.4)               | 20.8 (2.3)               |
| <b><math>GRS_{IR}</math></b>    |            |                          |                          |
| <b>FOS</b>                      | 10.4 (2.0) | 10.4 (2.0)               | 10.5 (2.0)               |
| T2D                             | 10.3 (2.4) | 10.3 (2.3)               | 10.3 (2.7)               |
| No T2D                          | 10.4 (2.0) | 10.4 (2.0)               | 10.5 (2.0)               |
| <b>CARDIA Whites</b>            | 10.4 (2.0) | 10.4 (2.0)               | 10.3 (2.1)               |
| T2D                             | 10.6 (1.9) | 10.5 (1.9)               | 10.8 (2.0)               |
| No T2D                          | 10.4 (2.0) | 10.4 (2.0)               | 10.1 (2.1)               |
| <b>CARDIA Blacks</b>            | 11.1 (1.9) | 11.1 (1.9)               | 11.0 (1.8)               |
| T2D                             | 11.4 (1.8) | 11.5 (1.8)               | 11.3 (1.7)               |
| No T2D                          | 11.0 (1.9) | 11.0 (1.9)               | 10.9 (1.9)               |

Data are mean (SD) weighted genotype risk scores (GRS) consisting of 20 single-nucleotide polymorphisms (SNP) associated with  $\beta$ -cell dysfunction ( $GRS_{\beta}$ ) and 10 SNP associated with insulin resistance ( $GRS_{IR}$ ) in the overall FOS and CARDIA cohorts and in participants with and without type 2 diabetes (T2D). Among FOS and CARDIA whites, GRS are weighted by the effects sizes from the DIAGRAM v3 meta-analysis(4). GRS are unweighted among CARDIA blacks.

SUPPLEMENTARY DATA

**Supplementary Table 3: Odds ratios for  $GRS_{\beta}$  and  $GRS_{IR}$  in prediction models for incident type 2 diabetes in the Framingham Offspring Study**

|                          | $GRS_{\beta}$ model | $GRS_{IR}$ model  | $GRS_{\beta} + GRS_{IR}$ model |
|--------------------------|---------------------|-------------------|--------------------------------|
| <b>Demographic model</b> |                     |                   |                                |
| $GRS_{\beta}$            | 1.11 (1.08, 1.15)*  | ---               | 1.11 (1.08, 1.15)*             |
| $GRS_{IR}$               | ---                 | 1.04 (1.00, 1.10) | 1.05 (1.00, 1.10)              |
| <b>Clinical model</b>    |                     |                   |                                |
| $GRS_{\beta}$            | 1.10 (1.06, 1.14)*  | ---               | 1.10 (1.06, 1.14)*             |
| $GRS_{IR}$               | ---                 | 0.98 (0.93, 1.04) | 0.99 (0.93, 1.04)              |

Data are odds ratios from pooled logistic regression models for incident type 2 diabetes and correspond to a 1-allele increase in the GRS. Demographic models are adjusted for age and sex. Clinical models are adjusted for age, sex, parental history of diabetes (yes vs. no), body-mass index, systolic blood pressure, fasting plasma glucose, high-density lipoprotein (HDL), and fasting triglycerides.  $GRS_{\beta}$  and  $GRS_{IR}$  models include only the  $GRS_{\beta}$  and  $GRS_{IR}$ , respectively. The  $GRS_{\beta} + GRS_{IR}$  model contains both terms. \* $p < 0.001$

SUPPLEMENTARY DATA

**Supplementary Table 4: Hazard ratios for  $GRS_{\beta}$  and  $GRS_{IR}$  in prediction models for incident type 2 diabetes among whites in the CARDIA Study**

|                          | $GRS_{\beta}$ model | $GRS_{IR}$ model  | $GRS_{\beta} + GRS_{IR}$ model |
|--------------------------|---------------------|-------------------|--------------------------------|
| <b>Demographic model</b> |                     |                   |                                |
| $GRS_{\beta}$            | 1.09 (1.02, 1.16)*  | ---               | 1.09 (1.02, 1.16)**            |
| $GRS_{IR}$               | ---                 | 1.06 (0.96, 1.17) | 1.06 (0.96, 1.17)              |
| <b>Clinical model</b>    |                     |                   |                                |
| $GRS_{\beta}$            | 1.09 (1.02, 1.17)** | ---               | 1.09 (1.02, 1.17)**            |
| $GRS_{IR}$               | ---                 | 1.01 (0.91, 1.12) | 1.01 (0.91, 1.11)              |

Data are hazard ratios from Cox regression models for incident type 2 diabetes and correspond to a 1-allele increase in the GRS. Demographic models are adjusted for age and sex. Clinical models are adjusted for age, sex, parental history of diabetes (yes vs. no), body-mass index, systolic blood pressure, fasting plasma glucose, log-transformed high-density lipoprotein (HDL), and log-transformed fasting triglycerides.  $GRS_{\beta}$  and  $GRS_{IR}$  models include only the  $GRS_{\beta}$  and  $GRS_{IR}$ , respectively. The  $GRS_{\beta} + GRS_{IR}$  model contains both terms. \* $p < 0.05$ , \*\* $p < 0.01$

SUPPLEMENTARY DATA

**Supplementary Table 5: Hazard ratios for  $GRS_{\beta}$  and  $GRS_{IR}$  in prediction models for incident type 2 diabetes among blacks in the CARDIA Study**

|                          | $GRS_{\beta}$ model | $GRS_{IR}$ model  | $GRS_{\beta} + GRS_{IR}$ model |
|--------------------------|---------------------|-------------------|--------------------------------|
| <b>Demographic model</b> |                     |                   |                                |
| $GRS_{\beta}$            | 1.06 (0.98, 1.14)   | ---               | 1.06 (0.98, 1.14)              |
| $GRS_{IR}$               | ---                 | 1.09 (1.00, 1.20) | 1.10 (1.00, 1.20)              |
| <b>Clinical model</b>    |                     |                   |                                |
| $GRS_{\beta}$            | 1.06 (0.99, 1.15)   | ---               | 1.07 (0.99, 1.15)              |
| $GRS_{IR}$               | ---                 | 1.05 (0.96, 1.15) | 1.05 (0.96, 1.16)              |

Data are hazard ratios from Cox regression models for incident type 2 diabetes and correspond to a 1-allele increase in the GRS. Demographic models are adjusted for age and sex. Clinical models are adjusted for age, sex, parental history of diabetes (yes vs. no), body-mass index, systolic blood pressure, fasting plasma glucose, log-transformed high-density lipoprotein (HDL), and log-transformed fasting triglycerides.  $GRS_{\beta}$  and  $GRS_{IR}$  models include only the  $GRS_{\beta}$  and  $GRS_{IR}$ , respectively. The  $GRS_{\beta} + GRS_{IR}$  model contains both terms.

SUPPLEMENTARY DATA

**Supplementary Table 6: Racial differences in the associations between GRS and incident type 2 diabetes**

|                          | <b>GRS<sub>t</sub></b> | <b>GRS<sub>β</sub></b> | <b>GRS<sub>IR</sub></b> |
|--------------------------|------------------------|------------------------|-------------------------|
| <b>Demographic model</b> |                        |                        |                         |
| Whites                   | 1.077 (1.059, 1.095)   | 1.109 (1.079, 1.139)   | 1.047 (1.003, 1.093)    |
| Blacks                   | 1.046 (1.005, 1.088)   | 1.058 (0.982, 1.140)   | 1.095 (0.997, 1.202)    |
| <i>p</i>                 | 0.19                   | 0.25                   | 0.39                    |
| <b>Clinical model</b>    |                        |                        |                         |
| Whites                   | 1.060 (1.040, 1.080)   | 1.098 (1.063, 1.133)   | 0.990 (0.945, 1.038)    |
| Blacks                   | 1.046 (1.003, 1.090)   | 1.063 (0.986, 1.147)   | 1.049 (0.957, 1.151)    |
| <i>p</i>                 | 0.57                   | 0.45                   | 0.28                    |

Data are effect sizes of the association between each GRS and incident T2D among FOS and CARDIA whites (meta-analyzed) and CARDIA blacks. Demographic models are adjusted for age and sex. Clinical models are adjusted for age, sex, parental history of diabetes (yes vs. no), body-mass index, systolic blood pressure, fasting plasma glucose, log-transformed high-density lipoprotein (HDL), and log-transformed fasting triglycerides. *P* values correspond to *t*-tests comparing the effect sizes between whites and blacks.

SUPPLEMENTARY DATA

**Supplementary Table 7:  $P$ -values for  $GRS_{\beta}$  and  $GRS_{IR}$  regression terms in prediction models for incident type 2 diabetes in the Framingham Offspring Study, stratified by body-mass index (BMI)**

|                                                | $GRS_{\beta}$ model | $GRS_{IR}$ model | $GRS_{\beta} + GRS_{IR}$ model |
|------------------------------------------------|---------------------|------------------|--------------------------------|
| <b>BMI<math>\geq</math>30 kg/m<sup>2</sup></b> |                     |                  |                                |
| $GRS_{\beta}$                                  | <0.001              | ---              | <0.001                         |
| $GRS_{IR}$                                     | ---                 | 0.427            | 0.426                          |
| <b>BMI&lt;30 kg/m<sup>2</sup></b>              |                     |                  |                                |
| $GRS_{\beta}$                                  | <0.001              | ---              | <0.001                         |
| $GRS_{IR}$                                     | ---                 | 0.223            | 0.199                          |

Data are  $p$ -values from pooled logistic regression models for incident type 2 diabetes, stratified by BMI category. Models are adjusted for age and sex.  $GRS_{\beta}$  and  $GRS_{IR}$  models include only the  $GRS_{\beta}$  and  $GRS_{IR}$ , respectively. The  $GRS_{\beta} + GRS_{IR}$  model contains both terms.



SUPPLEMENTARY DATA

**Supplementary Table 8:  $P$ -values for  $GRS_{\beta}$  and  $GRS_{IR}$  regression terms in prediction models for incident type 2 diabetes in the overall CARDIA Study, stratified by body-mass index (BMI)**

|                                                | $GRS_{\beta}$ model | $GRS_{IR}$ model | $GRS_{\beta} + GRS_{IR}$ model |
|------------------------------------------------|---------------------|------------------|--------------------------------|
| <b>BMI<math>\geq</math>30 kg/m<sup>2</sup></b> |                     |                  |                                |
| $GRS_{\beta}$                                  | 0.018               | ---              | 0.021                          |
| $GRS_{IR}$                                     | ---                 | 0.221            | 0.263                          |
| <b>BMI&lt;30 kg/m<sup>2</sup></b>              |                     |                  |                                |
| $GRS_{\beta}$                                  | 0.015               | ---              | 0.013                          |
| $GRS_{IR}$                                     | ---                 | 0.084            | 0.070                          |

Data are  $p$ -values from Cox regression models for incident type 2 diabetes, stratified by BMI category. Models are adjusted for age, sex, and race.  $GRS_{\beta}$  and  $GRS_{IR}$  models include only the  $GRS_{\beta}$  and  $GRS_{IR}$ , respectively. The  $GRS_{\beta} + GRS_{IR}$  model contains both terms.

SUPPLEMENTARY DATA

**Supplementary Table 9: Prediction models for incident type 2 diabetes in the Framingham Offspring Study, examining the interaction between genotype risk score and obesity**

|                                        | <b>GRS model</b>  | <b>GRS + obesity model</b> | <b>GRS*obesity interaction model</b> |
|----------------------------------------|-------------------|----------------------------|--------------------------------------|
| <b>GRS<sub>t</sub> model</b>           |                   |                            |                                      |
| GRS <sub>t</sub>                       | 1.08 (1.06, 1.10) | 1.08 (1.06, 1.10)          | 1.09 (1.07, 1.12)                    |
| Obesity                                | ---               | 4.46 (3.66, 5.43)          | 22.39 (1.66, 301.34)                 |
| GRS <sub>t</sub> *obesity interaction  | ---               | ---                        | 0.98 (0.94, 1.01)                    |
| <b>GRS<sub>β</sub> model</b>           |                   |                            |                                      |
| GRS <sub>β</sub>                       | 1.11 (1.08,1.15)  | 1.13 (1.09, 1.16)          | 1.14 (1.09, 1.19)                    |
| Obesity                                | ---               | 4.46 (3.66, 5.43)          | 8.44 (1.97, 36.16)                   |
| GRS <sub>β</sub> *obesity interaction  | ---               | ---                        | 0.97 (0.91, 1.04)                    |
| <b>GRS<sub>IR</sub> model</b>          |                   |                            |                                      |
| GRS <sub>IR</sub>                      | 1.04 (1.00, 1.10) | 1.03 (0.98, 1.09)          | 1.04 (0.98, 1.11)                    |
| Obesity                                | ---               | 4.31 (3.54, 5.25)          | 5.11 (1.82, 14.36)                   |
| GRS <sub>IR</sub> *obesity interaction | ---               | ---                        | 0.98 (0.89, 1.08)                    |

Data are odds ratios (OR) from pooled logistic regression models for type 2 diabetes per weighted allele increase in 62-SNP GRS (GRS<sub>t</sub>), β-cell GRS (GRS<sub>β</sub>), and insulin resistance GRS (GRS<sub>IR</sub>), or for obesity (BMI ≥ 30 kg/m<sup>2</sup>). All models are adjusted for age and sex. The GRS models include the corresponding GRS. GRS + obesity models include both the corresponding GRS and a term for obesity. GRS\*obesity interaction models include the corresponding GRS, an obesity term, and an interaction term between GRS and obesity.

SUPPLEMENTARY DATA

**Supplementary Table 10: Prediction models for incident type 2 diabetes in the overall CARDIA Study, examining the interaction between genotype risk score and obesity**

|                                        | <b>GRS model</b>  | <b>GRS + obesity model</b> | <b>GRS*obesity interaction model</b> |
|----------------------------------------|-------------------|----------------------------|--------------------------------------|
| <b>GRS<sub>t</sub> model</b>           |                   |                            |                                      |
| GRS <sub>t</sub>                       | 1.06 (1.03, 1.09) | 1.07 (1.04, 1.10)          | 1.07 (1.03, 1.10)                    |
| Obesity                                | ---               | 6.11 (4.52, 8.26)          | 9.99 (0.19, 517.69)                  |
| GRS <sub>t</sub> *obesity interaction  | ---               | ---                        | 0.99 (0.94, 1.05)                    |
| <b>GRS<sub>β</sub> model</b>           |                   |                            |                                      |
| GRS <sub>β</sub>                       | 1.09 (1.02, 1.16) | 1.09 (1.04, 1.14)          | 1.07 (1.01, 1.14)                    |
| Obesity                                | ---               | 6.17 (4.56, 8.34)          | 2.60 (0.28, 23.81)                   |
| GRS <sub>β</sub> *obesity interaction  | ---               | ---                        | 1.04 (0.94, 1.15)                    |
| <b>GRS<sub>IR</sub> model</b>          |                   |                            |                                      |
| GRS <sub>IR</sub>                      | 1.08 (1.01, 1.15) | 1.08 (1.01, 1.15)          | 1.10 (1.01, 1.19)                    |
| Obesity                                | ---               | 5.94 (4.40, 8.02)          | 9.61 (2.01, 45.85)                   |
| GRS <sub>IR</sub> *obesity interaction | ---               | ---                        | 0.96 (0.83, 1.10)                    |

Data are odds ratios (OR) from Cox regression models for type 2 diabetes per weighted allele increase in 62-SNP GRS (GRS<sub>t</sub>), β-cell GRS (GRS<sub>β</sub>), and insulin resistance GRS (GRS<sub>IR</sub>), or for obesity (BMI<sub>≥</sub>30 kg/m<sup>2</sup>). All models are adjusted for age, sex, and race. The GRS models include the corresponding GRS. GRS + obesity models include both the corresponding GRS and a term for obesity. GRS\*obesity interaction models include the corresponding GRS, an obesity term, and an interaction term between GRS and obesity.

**References**

1. Dimas AS, Lagou V, Barker A, Knowles JW, Mägi R, Hivert M-F, Benazzo A, Rybin D, Jackson AU, Stringham HM, Song C, Fischer-Rosinsky A, Boesgaard TW, Grarup N, Abbasi FA, Assimes TL, Hao K, Yang X, Lecoeur C, Barroso I, Bonnycastle LL, Böttcher Y, Bumpstead S, Chines PS, Erdos MR, Graessler J, Kovacs P, Morken MA, Narisu N, Payne F, Stancakova A, Swift AJ, Tönjes A, Bornstein SR, Cauchi S, Froguel P, Meyre D, Schwarz PE, Häring H-U, Smith U, Boehnke M, Bergman RN, Collins FS, Mohlke KL, Tuomilehto J, Quertemous T, Lind L, Hansen T, Pedersen O, Walker M, Pfeiffer AF, Spranger J, Stumvoll M, Meigs JB, Wareham NJ, Kuusisto J, Laakso M, Langenberg C, Dupuis J, Watanabe RM, Florez JC, Ingelsson E, McCarthy MI, Prokopenko I, investigators obotM: Impact of type 2 diabetes susceptibility variants on quantitative glycemic traits reveals mechanistic heterogeneity. *Diabetes* (in resubmission)
2. Manning AK, Hivert MF, Scott RA, Grimsby JL, Bouatia-Naji N, Chen H, Rybin D, Liu CT, Bielak LF, Prokopenko I, Amin N, Barnes D, Cadby G, Hottenga JJ, Ingelsson E, Jackson AU, Johnson T, Kanoni S, Ladenvall C, Lagou V, Lahti J, Lecoeur C, Liu Y, Martinez-Larrad MT, Montasser ME, Navarro P, Perry JR, Rasmussen-Torvik LJ, Salo P, Sattar N, Shungin D, Strawbridge RJ, Tanaka T, van Duijn CM, An P, de Andrade M, Andrews JS, Aspelund T, Atalay M, Aulchenko Y, Balkau B, Bandinelli S, Beckmann JS, Beilby JP, Bellis C, Bergman RN, Blangero J, Boban M, Boehnke M, Boerwinkle E, Bonnycastle LL, Boomsma DI, Borecki IB, Böttcher Y, Bouchard C, Brunner E, Budimir D, Campbell H, Carlson O, Chines PS, Clarke R, Collins FS, Corbaton-Anchuelo A, Couper D, de Faire U, Dedoussis GV, Deloukas P, Dimitriou M, Egan JM, Eiriksdottir G, Erdos MR, Eriksson JG, Eury E, Ferrucci L, Ford I, Forouhi NG, Fox CS, Franzosi MG, Franks PW, Frayling TM, Froguel P, Galan P, de Geus E, Gigante B, Glazer NL, Goel A, Groop L, Gudnason V, Hallmans G, Hamsten A, Hansson O, Harris TB, Hayward C, Heath S, Hercberg S, Hicks AA, Hingorani A, Hofman A, Hui J, Hung J, Jarvelin MR, Jhun MA, Johnson PC, Jukema JW, Jula A, Kao WH, Kaprio J, Kardina SL, Keinänen-Kiukkaanniemi S, Kivimäki M, Kolcic I, Kovacs P, Kumari M, Kuusisto J, Kyvik KO, Laakso M, Lakka T, Lannfelt L, Lathrop GM, Launer LJ, Leander K, Li G, Lind L, Lindstrom J, Lobbens S, Loos RJ, Luan J, Lyssenko V, Magi R, Magnusson PK, Marmot M, Meneton P, Mohlke KL, Mooser V, Morken MA, Miljkovic I, Narisu N, O'Connell J, Ong KK, Oostra BA, Palmer LJ, Palotie A, Pankow JS, Peden JF, Pedersen NL, Pehlic M, Peltonen L, Penninx B, Pericic M, Perola M, Perusse L, Peyser PA, Polasek O, Pramstaller PP, Province MA, Raikonen K, Rauramaa R, Rehnberg E, Rice K, Rotter JJ, Rudan I, Ruukonen A, Saaristo T, Sabater-Lleal M, Salomaa V, Savage DB, Saxena R, Schwarz P, Seedorf U, Sennblad B, Serrano-Rios M, Shuldiner AR, Sijbrands EJ, Siscovick DS, Smit JH, Small KS, Smith NL, Smith AV, Stancakova A, Stirrups K, Stumvoll M, Sun YV, Swift AJ, Tonjes A, Tuomilehto J, Trompet S, Uitterlinden AG, Uusitupa M, Vikstrom M, Vitart V, Vohl MC, Voight BF, Vollenweider P, Waeber G, Waterworth DM, Watkins H, Wheeler E, Widen E, Wild SH, Willems SM, Willemsen G, Wilson JF, Witteman JC, Wright AF, Yaghootkar H, Zelenika D, Zemunik T, Zgaga L, Wareham NJ, McCarthy MI, Barroso I, Watanabe RM, Florez JC, Dupuis J, Meigs JB, Langenberg C: A genome-wide approach accounting for body mass index identifies genetic variants influencing fasting glycemic traits and insulin resistance. *Nature Genetics* 2012;44:659-669
3. Lindgren CM, Heid IM, Randall JC, Lamina C, Steinthorsdottir V, Qi L, Speliotes EK, Thorleifsson G, Willer CJ, Herrera BM, Jackson AU, Lim N, Scheet P, Soranzo N, Amin N,

## SUPPLEMENTARY DATA

Aulchenko YS, Chambers JC, Drong A, Luan J, Lyon HN, Rivadeneira F, Sanna S, Timpson NJ, Zillikens MC, Zhao JH, Almgren P, Bandinelli S, Bennett AJ, Bergman RN, Bonnycastle LL, Bumpstead SJ, Chanock SJ, Cherkas L, Chines P, Coin L, Cooper C, Crawford G, Doering A, Dominiczak A, Doney AS, Ebrahim S, Elliott P, Erdos MR, Estrada K, Ferrucci L, Fischer G, Forouhi NG, Gieger C, Grallert H, Groves CJ, Grundy S, Guiducci C, Hadley D, Hamsten A, Havulinna AS, Hofman A, Holle R, Holloway JW, Illig T, Isomaa B, Jacobs LC, Jameson K, Jousilahti P, Karpe F, Kuusisto J, Laitinen J, Lathrop GM, Lawlor DA, Mangino M, McArdle WL, Meitinger T, Morken MA, Morris AP, Munroe P, Narisu N, Nordstrom A, Nordstrom P, Oostra BA, Palmer CN, Payne F, Peden JF, Prokopenko I, Renstrom F, Ruokonen A, Salomaa V, Sandhu MS, Scott LJ, Scuteri A, Silander K, Song K, Yuan X, Stringham HM, Swift AJ, Tuomi T, Uda M, Vollenweider P, Waeber G, Wallace C, Walters GB, Weedon MN, Witteman JC, Zhang C, Zhang W, Caulfield MJ, Collins FS, Davey Smith G, Day IN, Franks PW, Hattersley AT, Hu FB, Jarvelin MR, Kong A, Kooner JS, Laakso M, Lakatta E, Mooser V, Morris AD, Peltonen L, Samani NJ, Spector TD, Strachan DP, Tanaka T, Tuomilehto J, Uitterlinden AG, van Duijn CM, Wareham NJ, Hugh W, Waterworth DM, Boehnke M, Deloukas P, Groop L, Hunter DJ, Thorsteinsdottir U, Schlessinger D, Wichmann HE, Frayling TM, Abecasis GR, Hirschhorn JN, Loos RJ, Stefansson K, Mohlke KL, Barroso I, McCarthy MI: Genome-wide association scan meta-analysis identifies three loci influencing adiposity and fat distribution. *PLoS genetics* 2009;5:e1000508

4. Morris AP, Voight BF, Teslovich TM, Ferreira T, Segre AV, Steinthorsdottir V, Strawbridge RJ, Khan H, Grallert H, Mahajan A, Prokopenko I, Kang HM, Dina C, Esko T, Fraser RM, Kanoni S, Kumar A, Lagou V, Langenberg C, Luan J, Lindgren CM, Muller-Nurasyid M, Pechlivanis S, Rayner NW, Scott LJ, Wiltshire S, Yengo L, Kinnunen L, Rossin EJ, Raychaudhuri S, Johnson AD, Dimas AS, Loos RJ, Vedantam S, Chen H, Florez JC, Fox C, Liu CT, Rybin D, Couper DJ, Kao WH, Li M, Cornelis MC, Kraft P, Sun Q, van Dam RM, Stringham HM, Chines PS, Fischer K, Fontanillas P, Holmen OL, Hunt SE, Jackson AU, Kong A, Lawrence R, Meyer J, Perry JR, Platou CG, Potter S, Rehnberg E, Robertson N, Sivapalaratnam S, Stancakova A, Stirrups K, Thorleifsson G, Tikkanen E, Wood AR, Almgren P, Atalay M, Benediktsson R, Bonnycastle LL, Burt N, Carey J, Charpentier G, Crenshaw AT, Doney AS, Dorkhan M, Edkins S, Emilsson V, Eury E, Forsen T, Gertow K, Gigante B, Grant GB, Groves CJ, Guiducci C, Herder C, Hreidarsson AB, Hui J, James A, Jonsson A, Rathmann W, Klopp N, Kravic J, Krjutskov K, Langford C, Leander K, Lindholm E, Lobbens S, Mannisto S, Mirza G, Muhleisen TW, Musk B, Parkin M, Rallidis L, Saramies J, Sennblad B, Shah S, Sigurethsson G, Silveira A, Steinbach G, Thorand B, Trakalo J, Veglia F, Wennauer R, Winckler W, Zabaneh D, Campbell H, van Duijn C, Uitterlinden AG, Hofman A, Sijbrands E, Abecasis GR, Owen KR, Zeggini E, Trip MD, Forouhi NG, Syvanen AC, Eriksson JG, Peltonen L, Nothen MM, Balkau B, Palmer CN, Lyssenko V, Tuomi T, Isomaa B, Hunter DJ, Qi L, Shuldiner AR, Roden M, Barroso I, Wilsgaard T, Beilby J, Hovingh K, Price JF, Wilson JF, Rauramaa R, Lakka TA, Lind L, Dedoussis G, Njolstad I, Pedersen NL, Khaw KT, Wareham NJ, Keinanen-Kiukaanniemi SM, Saaristo TE, Korpi-Hyovalti E, Saltevo J, Laakso M, Kuusisto J, Metspalu A, Collins FS, Mohlke KL, Bergman RN, Tuomilehto J, Boehm BO, Gieger C, Hveem K, Cauchi S, Froguel P, Baldassarre D, Tremoli E, Humphries SE, Saleheen D, Danesh J, Ingelsson E, Ripatti S, Salomaa V, Erbel R, Jockel KH, Moebus S, Peters A, Illig T, de Faire U, Hamsten A, Morris AD, Donnelly PJ, Frayling TM, Hattersley AT, Boerwinkle E, Melander O, Kathiresan S, Nilsson PM, Deloukas P, Thorsteinsdottir U, Groop LC, Stefansson K, Hu F, Pankow JS, Dupuis J, Meigs JB, Altshuler D, Boehnke M, McCarthy MI: Large-scale

## SUPPLEMENTARY DATA

association analysis provides insights into the genetic architecture and pathophysiology of type 2 diabetes. *Nature Genetics* 2012;44:981-990
